# Supplementary material
Source: PubMed Central journal article supplement (PMC3325656)
Supplement: 1114774109_pnas.201114774SI.pdf [file 1114774109_pnas.201114774SI.pdf]

# Supporting Information

Jabbi et al. 10.1073/pnas.1114774109

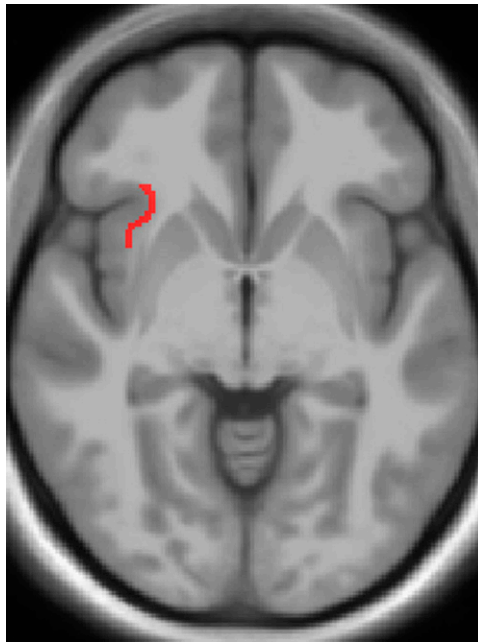

Fig. S1. Illustration of an axial slice of the left AI white matter mask used for DTI tractography.

Table S1. Manually segmented volume

| Area                          | Absolute volume, mm <sup>3</sup> | Hemispheric volume, % (SEM) |
|-------------------------------|----------------------------------|-----------------------------|
| Left whole insula             |                                  |                             |
| WS ( <i>n</i> = 14)           | 7,484.35                         | 1.65 (0.043)                |
| NC ( <i>n</i> = 23)           | 8,921.08                         | 1.76 (0.041)                |
| Post-hoc ANOVA <i>P</i> value | 0.004*                           | 0.091                       |
| Right whole insula            |                                  |                             |
| WS ( <i>n</i> = 14)           | 7361.7                           | 1.58 (0.028)                |
| NC ( <i>n</i> = 23)           | 8,761.47                         | 1.72 (0.034)                |
| Post-hoc ANOVA <i>P</i> value | 0.001*                           | 0.01*                       |
| Left anterior insula          |                                  |                             |
| WS ( <i>n</i> = 14)           | 3,180.07                         | 0.71 (0.039)                |
| NC ( <i>n</i> = 23)           | 4,180.34                         | 0.82 (0.024)                |
| Post-hoc ANOVA <i>P</i> value | 0.0005*                          | 0.01*                       |
| Right anterior insula         |                                  |                             |
| WS ( <i>n</i> = 14)           | 3,240.35                         | 0.71 (0.030)                |
| NC ( <i>n</i> = 23)           | 4,121.56                         | 0.81 (0.027)                |
| Post-hoc ANOVA <i>P</i> value | 0.0005*                          | 0.027*                      |

NC, normal control; WS, Williams syndrome.  
\*Significant difference.

**Table S2. VBM morphometry uncorrected for whole brain volume**

| Anatomical description     | MNI coordinate |     |     | t value |
|----------------------------|----------------|-----|-----|---------|
|                            | X              | Y   | Z   |         |
| Gray-matter volume NC > WS |                |     |     |         |
| AI/striatum                | 37             | 20  | 0   | 6.09    |
| AI/striatum                | -30            | 19  | -3  | 6.45    |
| Middle insula              | 37             | 8   | 1   | 3.93    |
| Middle insula              | -38            | 1   | -8  | 6.03    |
| Anterior/mid thalamus      | -1             | 1   | 6   | 8.81    |
| Subgenual cingulate/OFC    | 16             | 20  | -13 | 6.84    |
| Subcallosal cingulate/OFC  | -14            | 17  | 12  | 6.01    |
| Fusiform gyrus             | 31             | -53 | -2  | 4.95    |
| Fusiform gyrus             | -24            | -56 | -9  | 6.84    |
| IPS                        | 30             | -57 | 38  | 4.83    |
| IPS                        | -24            | -62 | 36  | 5.24    |
| Gray-matter volume WS > NC |                |     |     |         |
| Occipital gyrus            | -24            | -80 | 18  | 6.94    |

AI, anterior insula; IPS, intraparietal sulcus; MNI, Montreal Neurological Institute; NC, normal control; OFC, orbitofrontal cortex; rCBF, regional cerebral blood flow; VBM, voxel-based morphometry; WS, Williams syndrome.

**Table S3. VBM morphometry corrected for whole brain volume**

| Anatomical description           | MNI coordinate |     |     | t value |
|----------------------------------|----------------|-----|-----|---------|
|                                  | X              | Y   | Z   |         |
| Gray-matter volume controls > WS |                |     |     |         |
| AI/striatum                      | 30             | 20  | 0   | 3.80    |
| AI                               | -30            | 19  | -3  | 4.35    |
| Middle insula                    | 37             | 9   | 0   | 3.88    |
| Middle insula                    | -37            | 1   | -9  | 3.92    |
| Anterior/mid thalamus            | -2             | 1   | 3   | 8.03    |
| Subcallosal cingulate/OFC        | 14             | 19  | -12 | 5.13    |
| Subcallosal cingulate/OFC        | -13            | 16  | -11 | 4.77    |
| Brainstem                        | 8              | -38 | -36 | 4.96    |
| Fusiform gyrus                   | -30            | -53 | -9  | 3.94    |
| IPS                              | 32             | -78 | 26  | 6.26    |
| IPS                              | -27            | -75 | 29  | 4.71    |
| Inferior occipital cortex        | 9              | -70 | -6  | 4.81    |
| Gray-matter volume WS > controls |                |     |     |         |
| AI/frontal operculum/OFC         | 30             | 14  | -22 | 4.60    |
| OFC/Medial prefrontal cortex     | -24            | 17  | -21 | 8.19    |
| OFC                              | 22             | 41  | -16 | 5.88    |
| Amygdala                         | 12             | -2  | -22 | 3.65    |
| Amygdala/parahippocampus         | -11            | -4  | -14 | 3.31    |
| Parahippocampal gyrus            | 18             | -17 | -16 | 5.09    |
| Posterior cingulate              | 1              | -42 | 24  | 5.88    |
| Superior occipital gyrus         | -16            | -77 | 17  | 6.04    |
| Superior occipital gyrus         | 18             | -75 | 20  | 6.19    |
| Cerebellum                       | 22             | -83 | -36 | 3.96    |

AI, anterior insula; IPS, intraparietal sulcus; MNI, Montreal Neurological Institute; NC, normal control; OFC, orbitofrontal cortex; rCBF, regional cerebral blood flow; WS, Williams syndrome.

**Table S4. PET rCBF**

| Anatomical description          | MNI coordinate |     |     | t value |
|---------------------------------|----------------|-----|-----|---------|
|                                 | X              | Y   | Z   |         |
| Resting rCBF NC-WS              |                |     |     |         |
| Anterior insula/putamen         | -25            | 17  | 1   | 3.00    |
| AI/mid and posterior insula/STS | -39            | 1   | 9   | 5.92    |
| Anterior thalamus               | 0              | -3  | 8   | 3.26    |
| Mid/posterior insula            | 41             | 8   | 9   | 6.74    |
| Middle cingulate cortex         | 10             | -13 | 48  | 3.14    |
| Medial prefrontal gyrus         | 13             | 51  | 0   | 2.90    |
| IFG                             | -37            | 21  | 32  | 5.04    |
| IFG/premotor cortex             | 39             | 1   | 31  | 4.82    |
| Hippocampal formation           | -29            | -16 | -21 | 5.85    |
| Hippocampal formation           | 29             | -14 | -17 | 5.13    |
| Hippocampal formation           | 35             | -23 | -14 | 4.69    |
| Midbrain                        | 3              | -28 | -15 | 3.31    |
| Premotor cortex                 | 36             | -1  | 41  | 3.63    |
| Superior temporal gyrus         | -59            | -16 | -8  | 5.55    |
| Superior temporal gyrus         | 49             | -18 | 3   | 5.61    |
| Inferior/mid-occipital cortex   | -1             | -89 | 7   | 4.94    |
| Resting rCBF WS-NC              |                |     |     |         |
| AI                              | 32             | 23  | -19 | 4.92    |
| Posterior cingulate             | 5              | -45 | 44  | 3.96    |
| PCC/cerebellum                  | 10             | -59 | 11  | 5.64    |
| IFG                             | 19             | 59  | 27  | 5.48    |
| IFG                             | -9             | 63  | 25  | 4.45    |
| OFC                             | 33             | 49  | -13 | 3.27    |
| Superior frontal gyrus          | 23             | 14  | 59  | 3.28    |

AI, anterior insula; IFG, inferior frontal gyrus; MNI, Montreal Neurological Institute; NC, normal control; OFC, orbitofrontal cortex; rCBF, regional cerebral blood flow; STS, superior temporal cortex; WS, Williams syndrome.

**Table S5. Resting PET rCBF**

| Anatomical description                     | MNI coordinate |     |     | t value |
|--------------------------------------------|----------------|-----|-----|---------|
|                                            | X              | Y   | Z   |         |
| Right anterior insula connectivity NC > WS |                |     |     |         |
| ACC                                        | 7              | 29  | -5  | 3.68    |
| AI/OFC                                     | 29             | 17  | -17 | 3.55    |
| AI/OFC                                     | -23            | 23  | -12 | 3.59    |
| Amygdala                                   | -22            | -4  | -13 | 3.07    |
| Right anterior insula connectivity WS > NC |                |     |     |         |
| None                                       |                |     |     |         |
| Left anterior insula connectivity NC > WS  |                |     |     |         |
| Medial prefrontal cortex                   | 12             | 64  | 5   | 3.41    |
| ACC                                        | -7             | 34  | 11  | 3.47    |
| Posterior insula                           | 36             | -25 | 9   | 5.65    |
| Left anterior insula connectivity WS > NC  |                |     |     |         |
| Middle cingulate                           | -3             | 0   | 46  | 3.98    |

ACC, anterior cingulate cortex; AI, anterior insula; NC, normal control; OFC, orbitofrontal cortex; rCBF, regional cerebral blood flow; WS, Williams syndrome.
